# Supplementary material for: Xerotolerance: A New Property in Exiguobacterium Genus
Source: MDPI journal article supplement (doi:10.3390/microorganisms9122455), 2021-11-28
Supplement: s1 [file s1]

**Table S4.** *E. sibiricum* genes that are not present in *Exiguobacterium* sp. Helios

| Locus        | Protein                                                   |
|--------------|-----------------------------------------------------------|
| EXIG_RS00960 | hypothetical protein                                      |
| EXIG_RS00985 | CRISPR-associated helicase/endonuclease Cas3              |
| EXIG_RS00990 | type I-C CRISPR-associated protein Cas5                   |
| EXIG_RS00995 | type I-C CRISPR-associated protein Cas8c/Csd1             |
| EXIG_RS01000 | type I-C CRISPR-associated protein Cas7/Csd2              |
| EXIG_RS01005 | CRISPR-associated protein Cas4                            |
| EXIG_RS01010 | type I-C CRISPR-associated endonuclease Cas1              |
| EXIG_RS01015 | CRISPR-associated endonuclease Cas2                       |
| EXIG_RS01470 | IS1182 family transposase                                 |
| EXIG_RS01520 | IS30 family transposase                                   |
| EXIG_RS01685 | hypothetical protein                                      |
| EXIG_RS01695 | GHKL domain-containing protein                            |
| EXIG_RS01795 | hypothetical protein                                      |
| EXIG_RS01800 | DUF1819 family protein                                    |
| EXIG_RS01805 | DUF1788 domain-containing protein                         |
| EXIG_RS01810 | BREX system P-loop protein BrxC                           |
| EXIG_RS01815 | BREX-1 system adenine-specific DNA-methyltransferase PglX |
| EXIG_RS01820 | BREX-1 system phosphatase PglZ type A                     |
| EXIG_RS01825 | protease Lon-related BREX system protein BrxL             |
| EXIG_RS01830 | AAA family ATPase                                         |
| EXIG_RS01835 | HNH endonuclease                                          |
| EXIG_RS01875 | IS30 family transposase                                   |
| EXIG_RS01940 | hypothetical protein                                      |
| EXIG_RS02790 | IS30 family transposase                                   |
| EXIG_RS04040 | IS200/IS605 family transposase                            |
| EXIG_RS04535 | ferrous iron transport protein A                          |
| EXIG_RS04540 | ferrous iron transport protein B                          |
| EXIG_RS04545 | FeoB-associated Cys-rich membrane protein                 |
| EXIG_RS05245 | IS30 family transposase                                   |
| EXIG_RS05930 | IS30 family transposase                                   |
| EXIG_RS05965 | IS30 family transposase                                   |
| EXIG_RS05970 | N-acetylmuramoyl-L-alanine amidase                        |
| EXIG_RS06015 | nucleotidyltransferase domain-containing protein          |
| EXIG_RS06020 | hypothetical protein                                      |
| EXIG_RS06130 | IS200/IS605 family transposase                            |
| EXIG_RS06135 | transposase                                               |
| EXIG_RS06225 | IS1182 family transposase                                 |
| EXIG_RS06595 | hypothetical protein                                      |
| EXIG_RS06600 | hypothetical protein                                      |
| EXIG_RS06605 | hypothetical protein                                      |
| EXIG_RS06610 | ABC transporter permease                                  |
| EXIG_RS06630 | DMT family transporter                                    |
| EXIG_RS06635 | hypothetical protein                                      |
| EXIG_RS06700 | geobacillin-26 family protein                             |
| EXIG_RS06705 | transposase                                               |
| EXIG_RS06745 | suppressor of fused domain protein                        |
| EXIG_RS06865 | hypothetical protein                                      |
| EXIG_RS06895 | hypothetical protein                                      |
| EXIG_RS06900 | hypothetical protein                                      |
| EXIG_RS06905 | LysE family transporter                                   |
| EXIG_RS06915 | AraC family transcriptional regulator                     |
| EXIG_RS06930 | dihydrodipicolinate synthase family protein               |

|              |                                                      |
|--------------|------------------------------------------------------|
| EXIG_RS06970 | hypothetical protein                                 |
| EXIG_RS06980 | hypothetical protein                                 |
| EXIG_RS07035 | hypothetical protein                                 |
| EXIG_RS07085 | NAD(P)H-dependent oxidoreductase                     |
| EXIG_RS07090 | MarR family transcriptional regulator                |
| EXIG_RS07230 | HNH endonuclease                                     |
| EXIG_RS07240 | hypothetical protein                                 |
| EXIG_RS07310 | peptidase E                                          |
| EXIG_RS07320 | NUDIX domain-containing protein                      |
| EXIG_RS07325 | Fic family protein                                   |
| EXIG_RS07375 | bacteriorhodopsin                                    |
| EXIG_RS07410 | hypothetical protein                                 |
| EXIG_RS07510 | YnfA family protein                                  |
| EXIG_RS07715 | hypothetical protein                                 |
| EXIG_RS07775 | IS1182 family transposase                            |
| EXIG_RS07800 | hypothetical protein                                 |
| EXIG_RS07920 | hypothetical protein                                 |
| EXIG_RS08065 | alkaline shock response membrane anchor protein AmaP |
| EXIG_RS08070 | DUF2273 domain-containing protein                    |
| EXIG_RS08075 | Asp23/Gls24 family envelope stress response protein  |
| EXIG_RS08435 | IS200/IS605 family transposase                       |
| EXIG_RS10535 | IS30 family transposase                              |
| EXIG_RS10545 | IS30 family transposase                              |
| EXIG_RS11140 | ABC transporter permease                             |
| EXIG_RS11355 | IS30 family transposase                              |
| EXIG_RS11865 | IS1182 family transposase                            |
| EXIG_RS12100 | site-specific DNA-methyltransferase                  |
| EXIG_RS12105 | helix-turn-helix transcriptional regulator           |
| EXIG_RS12110 | restriction endonuclease BglII                       |
| EXIG_RS12115 | AIPR family protein                                  |
| EXIG_RS12750 | hypothetical protein                                 |
| EXIG_RS12755 | hypothetical protein                                 |
| EXIG_RS13215 | ImmA/IrrE family metallo-endorpeptidase              |
| EXIG_RS13220 | hypothetical protein                                 |
| EXIG_RS13230 | hexose-6-phosphate:phosphate antiporter              |
| EXIG_RS13235 | extracellular solute-binding protein                 |
| EXIG_RS13240 | DUF3919 family protein                               |
| EXIG_RS13255 | DUF5011 domain-containing protein                    |
| EXIG_RS13270 | hypothetical protein                                 |
| EXIG_RS13275 | hypothetical protein                                 |
| EXIG_RS13280 | zinc ribbon domain-containing protein                |
| EXIG_RS13285 | hypothetical protein                                 |
| EXIG_RS13290 | zinc ribbon domain-containing protein                |
| EXIG_RS13295 | zinc ribbon domain-containing protein                |
| EXIG_RS13305 | hypothetical protein                                 |
| EXIG_RS13330 | hypothetical protein                                 |
| EXIG_RS13345 | oligosaccharide flippase family protein              |
| EXIG_RS13350 | hypothetical protein                                 |
| EXIG_RS13450 | IS30 family transposase                              |
| EXIG_RS13715 | ATP-binding protein                                  |
| EXIG_RS13985 | hypothetical protein                                 |
| EXIG_RS14010 | hypothetical protein                                 |
| EXIG_RS14020 | HEAT repeat domain-containing protein                |
| EXIG_RS14030 | hypothetical protein                                 |

|              |                                                                         |
|--------------|-------------------------------------------------------------------------|
| EXIG_RS14900 | FAD:protein FMN transferase                                             |
| EXIG_RS14905 | hypothetical protein                                                    |
| EXIG_RS14960 | IS1182 family transposase                                               |
| EXIG_RS15210 | hypothetical protein                                                    |
| EXIG_RS15335 | hypothetical protein                                                    |
| EXIG_RS15340 | hypothetical protein                                                    |
| EXIG_RS15585 | hypothetical protein                                                    |
| EXIG_RS15635 | hypothetical protein                                                    |
| EXIG_RS15675 | IS3 family transposase                                                  |
| EXIG_RS15685 | IS3 family transposase                                                  |
| EXIG_RS15710 | IS30 family transposase                                                 |
| EXIG_RS15715 | type II toxin-antitoxin system mRNA interferase toxin, RelE/StbE family |
| EXIG_RS15730 | IS3 family transposase                                                  |
| EXIG_RS15740 | transposase                                                             |
| EXIG_RS15745 | IS3 family transposase                                                  |
| EXIG_RS15775 | IS3 family transposase                                                  |
| EXIG_RS15905 | hypothetical protein                                                    |
| EXIG_RS15915 | hypothetical protein                                                    |
| EXIG_RS15925 | hypothetical protein                                                    |
| EXIG_RS15945 | hypothetical protein                                                    |
| EXIG_RS15960 | hypothetical protein                                                    |
| EXIG_RS15965 | hypothetical protein                                                    |
| EXIG_RS15970 | hypothetical protein                                                    |
