# Supplementary material for: Xerotolerance: A New Property in Exiguobacterium Genus
Source: MDPI journal article supplement (doi:10.3390/microorganisms9122455), 2021-11-28
Supplement: s1 [file s1]

**Table S2.** Genes from *Exiguobacterium* sp. Helios putatively involved in flagellum synthesis and functionality. The percentage of amino acids identity (%ID aa) is shown.

| Gene            | Locus         | Function defined in <i>B. subtilis</i> subsp. <i>subtilis</i> str. 168               | % ID aa | Accession No. |
|-----------------|---------------|--------------------------------------------------------------------------------------|---------|---------------|
| <i>motA</i>     | HNY42_RS00450 | Flagellar motor rotation protein                                                     | 54.23%  | P28611.1      |
| <i>motB</i>     | HNY42_RS00455 | Flagellar motor rotation protein                                                     | 45.87%  | P28612.1      |
| <i>swrB</i>     | HNY42_RS11055 | RNA polymerase sigma factor ( $\sigma$ D) for flagellar operon                       | 57.20%  | P10726.2      |
| <i>cheD</i>     | HNY42_RS11060 | Chemotaxis protein                                                                   | 45.16%  | P40404.1      |
| <i>cheC</i>     | HNY42_RS11065 | Chemotaxis protein, inhibitor of MCP methylation                                     | 34.50%  | P40403.1      |
| <i>cheW</i>     | HNY42_RS11070 | Positive regulator of CheA protein activity                                          | 40.88%  | P39802.1      |
| <i>cheA</i>     | HNY42_RS11075 | Signal transduction histidine kinase                                                 | 48.36%  | P29072.2      |
| <i>fleN</i>     | HNY42_RS11080 | Flagellar synthesis regulator                                                        | 36.08%  | P40742.1      |
| <i>flhF</i>     | HNY42_RS11085 | Flagellar biosynthesis protein                                                       | 38.61%  | Q01960.1      |
| <i>flhA</i>     | HNY42_RS11090 | Flagellar biosynthesis protein                                                       | 63.56%  | P35620.2      |
| <i>flhB</i>     | HNY42_RS11095 | Flagellar biosynthesis protein                                                       | 50.28%  | P35538.2      |
| <i>fliR</i>     | HNY42_RS11100 | Flagellar biosynthesis protein                                                       | 36.14%  | P35537.2      |
| <i>fliQ</i>     | HNY42_RS11105 | Flagellar biosynthesis protein                                                       | 57.14%  | P35535.1      |
| <i>fliP</i>     | HNY42_RS11110 | Flagellar biosynthesis protein                                                       | 64.65%  | P35528.1      |
| <i>fliZ</i>     | HNY42_RS11115 | Flagellar biosynthesis protein                                                       | 29.47%  | P35536.1      |
| <i>cheY</i>     | HNY42_RS11120 | Chemotaxis regulator, transmits chemoreceptor signals to flagellar motor components. | 77.50%  | P24072.3      |
| <i>fliN</i>     | HNY42_RS11125 | Flagellar motor switch protein                                                       | 53.77%  | P24073.2      |
| <i>fliM</i>     | HNY42_RS11130 | Flagellar motor switch protein                                                       | 53.44%  | P23453.1      |
| <i>fliL</i>     | HNY42_RS11135 | Flagellar biosynthesis protein                                                       | ND      |               |
| <i>flbD</i>     | HNY42_RS11140 | Flagellar protein                                                                    | 39.39%  | C0H412.1      |
| <i>flgE</i>     | HNY42_RS11145 | Flagellar basal-body rod protein                                                     | 51.84%  | P23446.2      |
| <i>flgD</i>     | HNY42_RS11150 | Flagellar basal-body rod modification protein                                        | 44.88%  | P23455.1      |
| <i>fliK</i>     | HNY42_RS11155 | Flagellar hook-length control protein                                                | ND      |               |
| <i>flbB</i>     | HNY42_RS11160 | Flagellar protein                                                                    | ND      |               |
| <i>fliJ</i>     | HNY42_RS11165 | Flagellar protein                                                                    | ND      |               |
| <i>fliI</i>     | HNY42_RS11170 | Flagellum-specific ATP synthase                                                      | 63.49%  | P23445.2      |
| <i>fliH</i>     | HNY42_RS11175 | Flagellar assembly protein                                                           | ND      |               |
| <i>fliG</i>     | HNY42_RS11180 | Flagellar motor switch protein                                                       | 71.00%  | P23448.1      |
| <i>fliF</i>     | HNY42_RS11185 | Flagellar M-ring protein                                                             | 41.30%  | P23447.2      |
| <i>fliE</i>     | HNY42_RS11190 | Flagellar hook-basal body complex protein                                            | 39.81%  | P24502.1      |
| <i>flgC</i>     | HNY42_RS11195 | Flagellar basal-body rod protein                                                     | 52.00%  | P24501.1      |
| <i>flgB</i>     | HNY42_RS11200 | Flagellar basal-body rod protein                                                     | 40.34%  | P24500.1      |
| <i>fliS</i>     | HNY42_RS13935 | Flagellar secretion chaperone                                                        | ND      |               |
|                 | HNY42_RS13970 |                                                                                      | 50.83%  | P39739.1      |
| <i>fliD</i>     | HNY42_RS13975 | Flagellar hook-associated protein                                                    | 33.21%  | P39738.2      |
| <i>yvyC</i>     | HNY42_RS13980 | Flagellar protein                                                                    | 46.03%  | P39737.1      |
| <i>flaA/hag</i> | HNY42_RS13940 | Flagellin protein                                                                    | 48.23%  | P02968.2      |
|                 | HNY42_RS13985 |                                                                                      | 57.24%  |               |
| <i>csrA</i>     | HNY42_RS14055 | Translational regulator CsrA                                                         | 63.01%  | P33911.1      |
| <i>fliW</i>     | HNY42_RS14060 | Flagellar assembly factor                                                            | 40.29%  | P96503.1      |
| <i>yviE</i>     | HNY42_RS14065 | Uncharacterized protein                                                              | 33.88%  | P96502.1      |
| <i>flgL</i>     | HNY42_RS14070 | Flagellar hook-associated protein                                                    | 36.76%  | P96501.1      |
| <i>flgK</i>     | HNY42_RS14075 | Flagellar hook-associated protein                                                    | 40.84%  | P39810.2      |
| <i>flgN</i>     | HNY42_RS14080 | Flagellar biosynthesis/type III secretory pathway chaperone                          | ND      |               |
| <i>flgM</i>     | HNY42_RS14085 | Anti-sigma-28 factor                                                                 | ND      |               |
| <i>flhP</i>     | HNY42_RS15010 | Flagellar basal-body rod protein                                                     | 32.23%  | P39753.3      |
| <i>flhO</i>     | HNY42_RS15015 | Flagellar basal-body rod protein                                                     | 39.57%  | P39752.2      |
