# Supplementary material for: Xerotolerance: A New Property in Exiguobacterium Genus
Source: MDPI journal article supplement (doi:10.3390/microorganisms9122455), 2021-11-28
Supplement: s1 [file s1]

**Table S1.** Plasmid pMCEX annotation at NCBI.

| <b>Locus</b>         | <b>Length (pb)</b> | <b>Product</b>                                       | <b>Protein id</b> |
|----------------------|--------------------|------------------------------------------------------|-------------------|
| <i>HNY42_RS15710</i> | 144                | hypothetical protein                                 | WP_188005512.1    |
| <i>HNY42_RS16180</i> | 1698               | hypothetical protein                                 | WP_188005511.1    |
| <i>HNY42_RS16175</i> | 984                | beta-ketoacyl-ACP synthase 3                         | WP_188005510.1    |
| <i>HNY42_RS16170</i> | 189                | hypothetical protein                                 | WP_188005509.1    |
| <i>HNY42_RS16165</i> | 804                | SMI1/KNR4 family protein                             | WP_188005508.1    |
| <i>HNY42_RS16160</i> | 1035               | hypothetical protein                                 | WP_188005561.1    |
| <i>HNY42_RS16155</i> | 291                | YolD-like family protein                             | WP_188005507.1    |
| <i>HNY42_RS16150</i> | 225                | ribbon-helix-helix protein, CopG family              | WP_188005506.1    |
| <i>HNY42_RS16145</i> | 270                | type II toxin-antitoxin system RelE/ParE familytoxin | WP_188005505.1    |
| <i>HNY42_RS16140</i> | 720                | HNH endonuclease                                     | WP_188005504.1    |
| <i>HNY42_RS16135</i> | 612                | hypothetical protein                                 | WP_188005503.1    |
| <i>HNY42_RS16130</i> | 618                | hypothetical protein                                 | WP_188005502.1    |
| <i>HNY42_RS16125</i> | 4065               | DNRLRE domain-containing protein                     | WP_188005501.1    |
| <i>HNY42_RS16120</i> | 273                | hypothetical protein                                 | WP_188005500.1    |
| <i>HNY42_RS16115</i> | 882                | hypothetical protein                                 | WP_188005499.1    |
| <i>HNY42_RS16110</i> | 1932               | hypothetical protein                                 | WP_188005498.1    |
| <i>HNY42_RS16105</i> | 1035               | LD-carboxypeptidase                                  | WP_188005497.1    |
| <i>HNY42_RS16100</i> | 1275               | MFS transporter                                      | WP_188005496.1    |
| <i>HNY42_RS16095</i> | 915                | phosphotransferase                                   | WP_188005495.1    |
| <i>HNY42_RS16090</i> | 1788               | alanine--tRNA ligase                                 | WP_188005494.1    |
| <i>HNY42_RS16085</i> | 642                | deoxynucleoside kinase                               | WP_188005493.1    |
| <i>HNY42_RS16080</i> | 858                | hypothetical protein                                 | WP_188005492.1    |
| <i>HNY42_RS16075</i> | 774                | hypothetical protein                                 | WP_188005491.1    |
| <i>HNY42_RS16070</i> | 1227               | hypothetical protein                                 | WP_188005490.1    |
| <i>HNY42_RS16065</i> | 1200               | ATP-grasp domain-containing protein                  | WP_188005489.1    |
| <i>HNY42_RS16060</i> | 1233               | glycosyltransferase                                  | WP_188005488.1    |
| <i>HNY42_RS16055</i> | 1071               | asparaginase                                         | WP_188005487.1    |
| <i>HNY42_RS16050</i> | 891                | methyltransferase domain-containing protein          | WP_188005486.1    |
| <i>HNY42_RS16045</i> | 1128               | hypothetical protein                                 | WP_188005485.1    |
| <i>HNY42_RS16040</i> | 960                | NAD-dependent epimerase/dehydratase family protein   | WP_188005484.1    |
| <i>HNY42_RS16035</i> | 1089               | CDP-glucose 4,6-dehydratase                          | WP_188005483.1    |
| <i>HNY42_RS16030</i> | 801                | NTP transferase domain-containing protein            | WP_188005482.1    |
| <i>HNY42_RS16025</i> | 879                | helix-turn-helix domain-containing protein           | WP_188005481.1    |
| <i>HNY42_RS16020</i> | 477                | hypothetical protein                                 | WP_188005480.1    |
| <i>HNY42_RS16015</i> | 1935               | AAA family ATPase                                    | WP_188005479.1    |
| <i>HNY42_RS16010</i> | 1305               | hypothetical protein                                 | WP_188005478.1    |
| <i>HNY42_RS16005</i> | 798                | DUF3800 domain-containing protein                    | WP_188005477.1    |
| <i>HNY42_RS16000</i> | 498                | hypothetical protein                                 | WP_188005476.1    |
| <i>HNY42_RS15995</i> | 651                | hypothetical protein                                 | WP_188005475.1    |
| <i>HNY42_RS15990</i> | 2502               | hypothetical protein                                 | WP_188005474.1    |
| <i>HNY42_RS15985</i> | 474                | DNA mismatch endonuclease Vsr                        | WP_188005473.1    |
| <i>HNY42_RS15980</i> | 1269               | DNA (cytosine-5-)-methyltransferase                  | WP_188005472.1    |
| <i>HNY42_RS15975</i> | 777                | hypothetical protein                                 | WP_188005471.1    |

|                      |      |                                                                    |                |
|----------------------|------|--------------------------------------------------------------------|----------------|
| <i>HNY42_RS15970</i> | 231  | hypothetical protein                                               | WP_188005470.1 |
| <i>HNY42_RS15965</i> | 348  | hypothetical protein                                               | WP_188005560.1 |
| <i>HNY42_RS15960</i> | 171  | hypothetical protein                                               | WP_188005557.1 |
| <i>HNY42_RS15955</i> | 3354 | hypothetical protein                                               | WP_188005556.1 |
| <i>HNY42_RS15950</i> | 2574 | helicase SNF2                                                      | WP_188005555.1 |
| <i>HNY42_RS15945</i> | 1215 | hypothetical protein                                               | WP_188005554.1 |
| <i>HNY42_RS15940</i> | 789  | hypothetical protein                                               | WP_188005553.1 |
| <i>HNY42_RS15935</i> | 777  | AAA family ATPase                                                  | WP_188005552.1 |
| <i>HNY42_RS15930</i> | 690  | ribbon-helix-helix protein, CopG family                            | WP_188005551.1 |
| <i>HNY42_RS15925</i> | 780  | AAA family ATPase                                                  | WP_188005550.1 |
| <i>HNY42_RS15920</i> | 1077 | hypothetical protein                                               | WP_188005549.1 |
| <i>HNY42_RS15915</i> | 1437 | hypothetical protein                                               | WP_188005548.1 |
| <i>HNY42_RS15910</i> | 1476 | hypothetical protein                                               | WP_188005547.1 |
| <i>HNY42_RS15905</i> | 1155 | hypothetical protein                                               | WP_188005546.1 |
| <i>HNY42_RS15900</i> | 585  | DUF4411 family protein                                             | WP_188005545.1 |
| <i>HNY42_RS15895</i> | 507  | helix-turn-helix domain-containing protein                         | WP_188005544.1 |
| <i>HNY42_RS15890</i> | 1017 | tyrosine-type recombinase/integrase                                | WP_188005543.1 |
| <i>HNY42_RS15885</i> | 672  | hypothetical protein                                               | WP_188005542.1 |
| <i>HNY42_RS15880</i> | 981  | hypothetical protein                                               | WP_188005541.1 |
| <i>HNY42_RS15875</i> | 1182 | hypothetical protein                                               | WP_188005540.1 |
| <i>HNY42_RS15870</i> | 900  | hypothetical protein                                               | WP_188005539.1 |
| <i>HNY42_RS15865</i> | 489  | helix-turn-helix domain-containing protein                         | WP_188005538.1 |
| <i>HNY42_RS15860</i> | 189  | hypothetical protein                                               | WP_188005537.1 |
| <i>HNY42_RS15855</i> | 225  | hypothetical protein                                               | WP_188005536.1 |
| <i>HNY42_RS15850</i> | 1092 | hypothetical protein                                               | WP_188005535.1 |
| <i>HNY42_RS15845</i> | 2370 | type IV secretory system conjugative<br>DNAtransfer family protein | WP_188005534.1 |
| <i>HNY42_RS15840</i> | 252  | hypothetical protein                                               | WP_119924055.1 |
| <i>HNY42_RS15835</i> | 429  | hypothetical protein                                               | WP_188005533.1 |
| <i>HNY42_RS15830</i> | 1311 | hypothetical protein                                               | WP_188005532.1 |
| <i>HNY42_RS15825</i> | 312  | hypothetical protein                                               | WP_188005531.1 |
| <i>HNY42_RS15820</i> | 636  | hypothetical protein                                               | WP_188005530.1 |
| <i>HNY42_RS15815</i> | 1944 | type IV secretion system protein VirB4                             | WP_188005529.1 |
| <i>HNY42_RS15810</i> | 1065 | lysozyme family protein                                            | WP_188005559.1 |
| <i>HNY42_RS15805</i> | 558  | hypothetical protein                                               | WP_188005528.1 |
| <i>HNY42_RS15800</i> | 840  | hypothetical protein                                               | WP_188005527.1 |
| <i>HNY42_RS15795</i> | 147  | hypothetical protein                                               | WP_188005526.1 |
| <i>HNY42_RS15790</i> | 252  | hypothetical protein                                               | WP_188005525.1 |
| <i>HNY42_RS15785</i> | 1161 | hypothetical protein                                               | WP_188005524.1 |
| <i>HNY42_RS15780</i> | 456  | hypothetical protein                                               | WP_188005523.1 |
| <i>HNY42_RS15775</i> | 279  | hypothetical protein                                               | WP_188005522.1 |
| <i>HNY42_RS15770</i> | 1464 | ImmA/IrrE family metallo-endopeptidase                             | WP_188005521.1 |
| <i>HNY42_RS15765</i> | 693  | hypothetical protein                                               | WP_188005520.1 |
| <i>HNY42_RS15760</i> | 162  | hypothetical protein                                               | WP_158537545.1 |
| <i>HNY42_RS15755</i> | 438  | DUF5067 domain-containing protein                                  | WP_188005558.1 |
| <i>HNY42_RS15750</i> | 225  | DUF3006 family protein                                             | WP_188005519.1 |
| <i>HNY42_RS15745</i> | 846  | MBL fold metallo-hydrolase                                         | WP_188005518.1 |

|                      |     |                            |                |
|----------------------|-----|----------------------------|----------------|
| <i>HNY42_RS15740</i> | 198 | hypothetical protein       | WP_188005517.1 |
| <i>HNY42_RS15735</i> | 861 | S8 family serine peptidase | WP_131504374.1 |
| <i>HNY42_RS15730</i> | 915 | hypothetical protein       | WP_188005516.1 |
| <i>HNY42_RS15725</i> | 480 | hypothetical protein       | WP_188005515.1 |
| <i>HNY42_RS15720</i> | 387 | GtrA family protein        | WP_188005514.1 |
| <i>HNY42_RS15715</i> | 960 | glycosyltransferase        | WP_188005513.1 |
