# Supplementary material for: Xerotolerance: A New Property in Exiguobacterium Genus
Source: MDPI journal article supplement (doi:10.3390/microorganisms9122455), 2021-11-28
Supplement: s1 [file s1]

**Table S3.** *Exiguobacterium* sp. Helios genes that are not present in *E. sibiricum*

| Locus         | Protein                                             |
|---------------|-----------------------------------------------------|
| HNY42_RS00240 | phosphotransferase                                  |
| HNY42_RS01115 | hypothetical protein                                |
| HNY42_RS01120 | hypothetical protein                                |
| HNY42_RS01125 | VOC family protein                                  |
| HNY42_RS01140 | DUF4230 domain-containing protein                   |
| HNY42_RS01145 | hypothetical protein                                |
| HNY42_RS02265 | phosphotransferase                                  |
| HNY42_RS02920 | hypothetical protein                                |
| HNY42_RS02930 | copper resistance protein CopC                      |
| HNY42_RS03025 | DUF4352 domain-containing protein                   |
| HNY42_RS03030 | hypothetical protein                                |
| HNY42_RS03035 | hypothetical protein                                |
| HNY42_RS03040 | hypothetical protein                                |
| HNY42_RS03045 | dynamain family protein                             |
| HNY42_RS03065 | DEAD/DEAH box helicase family protein               |
| HNY42_RS03070 | TIR domain-containing protein                       |
| HNY42_RS03080 | DUF3006 family protein                              |
| HNY42_RS03090 | DUF262 domain-containing protein                    |
| HNY42_RS03095 | hypothetical protein                                |
| HNY42_RS03100 | hypothetical protein                                |
| HNY42_RS03115 | extracellular solute-binding protein                |
| HNY42_RS03155 | excalibur calcium-binding domain-containing protein |
| HNY42_RS03175 | class I SAM-dependent methyltransferase             |
| HNY42_RS03970 | IS3 family transposase                              |
| HNY42_RS06980 | hypothetical protein                                |
| HNY42_RS07210 | helix-turn-helix domain-containing protein          |
| HNY42_RS07235 | hypothetical protein                                |
| HNY42_RS07240 | MepB family protein                                 |
| HNY42_RS07245 | RNA polymerase sigma-70 factor                      |
| HNY42_RS07255 | MarR family transcriptional regulator               |
| HNY42_RS07260 | NtaA/DmoA family FMN-dependent monooxygenase        |
| HNY42_RS07270 | NAD(P)-binding domain-containing protein            |
| HNY42_RS07465 | antibiotic biosynthesis monooxygenase               |
| HNY42_RS07490 | hypothetical protein                                |
| HNY42_RS07495 | hypothetical protein                                |
| HNY42_RS07505 | hypothetical protein                                |
| HNY42_RS07510 | Petrobactin biosynthesis protein AsbE               |
| HNY42_RS07515 | TIM barrel protein                                  |
| HNY42_RS07545 | hypothetical protein                                |
| HNY42_RS07680 | spore coat protein                                  |
| HNY42_RS07685 | spore coat protein                                  |
| HNY42_RS07695 | DUF2817 domain-containing protein                   |
| HNY42_RS07740 | hypothetical protein                                |
| HNY42_RS07820 | GNAT family N-acetyltransferase                     |
| HNY42_RS07825 | SMI1/KNR4 family protein                            |
| HNY42_RS07830 | hypothetical protein                                |
| HNY42_RS07845 | hypothetical protein                                |
| HNY42_RS07950 | hypothetical protein                                |
| HNY42_RS07975 | PTS sugar transporter subunit IIB                   |
| HNY42_RS07980 | PTS lactose/cellobiose transporter subunit IIA      |
| HNY42_RS07985 | PTS cellobiose transporter subunit IIC              |
| HNY42_RS08000 | DUF624 domain-containing protein                    |

|                      |                                                 |
|----------------------|-------------------------------------------------|
| <i>HNH42_RS08010</i> | sugar ABC transporter substrate-binding protein |
| <i>HNH42_RS08025</i> | family 43 glycosylhydrolase                     |
| <i>HNH42_RS08035</i> | L-ribulose-5-phosphate 4-epimerase              |
| <i>HNH42_RS08040</i> | L-arabinose isomerase                           |
| <i>HNH42_RS08045</i> | alpha-N-arabinofuranosidase                     |
| <i>HNH42_RS08055</i> | iron-containing alcohol dehydrogenase           |
| <i>HNH42_RS08060</i> | family 43 glycosylhydrolase                     |
| <i>HNH42_RS08065</i> | family 43 glycosylhydrolase                     |
| <i>HNH42_RS08070</i> | hypothetical protein                            |
| <i>HNH42_RS08080</i> | hypothetical protein                            |
| <i>HNH42_RS08120</i> | hypothetical protein                            |
| <i>HNH42_RS08165</i> | helix-turn-helix domain-containing protein      |
| <i>HNH42_RS08190</i> | hypothetical protein                            |
| <i>HNH42_RS08200</i> | barstar family protein                          |
| <i>HNH42_RS08215</i> | cupin                                           |
| <i>HNH42_RS08230</i> | WYL domain-containing protein                   |
| <i>HNH42_RS08300</i> | DUF4304 domain-containing protein               |
| <i>HNH42_RS08305</i> | hypothetical protein                            |
| <i>HNH42_RS08410</i> | class I SAM-dependent methyltransferase         |
| <i>HNH42_RS08415</i> | hypothetical protein                            |
| <i>HNH42_RS08440</i> | acetoacetate decarboxylase family protein       |
| <i>HNH42_RS08715</i> | hypothetical protein                            |
| <i>HNH42_RS08720</i> | GNAT family N-acetyltransferase                 |
| <i>HNH42_RS08735</i> | DUF1048 domain-containing protein               |
| <i>HNH42_RS08740</i> | helix-turn-helix transcriptional regulator      |
| <i>HNH42_RS08745</i> | CPBP family intramembrane metalloprotease       |
| <i>HNH42_RS08810</i> | chitin disaccharide deacetylase                 |
| <i>HNH42_RS08820</i> | 6-phospho-beta-glucosidase                      |
| <i>HNH42_RS08825</i> | PTS transporter subunit EIIC                    |
| <i>HNH42_RS08830</i> | PTS lactose/cellobiose transporter subunit IIA  |
| <i>HNH42_RS08835</i> | PTS sugar transporter subunit IIB               |
| <i>HNH42_RS09120</i> | hypothetical protein                            |
| <i>HNH42_RS09125</i> | ABC transporter permease subunit                |
| <i>HNH42_RS09185</i> | MarR family transcriptional regulator           |
| <i>HNH42_RS09190</i> | hypothetical protein                            |
| <i>HNH42_RS09230</i> | DUF3169 family protein                          |
| <i>HNH42_RS09275</i> | ABC transporter permease                        |
| <i>HNH42_RS09280</i> | hypothetical protein                            |
| <i>HNH42_RS09305</i> | IS3 family transposase                          |
| <i>HNH42_RS09340</i> | MarR family transcriptional regulator           |
| <i>HNH42_RS09450</i> | phosphotransferase                              |
| <i>HNH42_RS09455</i> | phosphotransferase                              |
| <i>HNH42_RS09530</i> | group-specific protein                          |
| <i>HNH42_RS09570</i> | serine hydrolase                                |
| <i>HNH42_RS12045</i> | hypothetical protein                            |
| <i>HNH42_RS13520</i> | DUF2785 domain-containing protein               |
| <i>HNH42_RS13615</i> | AAA family ATPase                               |
| <i>HNH42_RS13700</i> | TIR domain-containing protein                   |
| <i>HNH42_RS13705</i> | hypothetical protein                            |
| <i>HNH42_RS13710</i> | hypothetical protein                            |
| <i>HNH42_RS13720</i> | hypothetical protein                            |
| <i>HNH42_RS13725</i> | hypothetical protein                            |
| <i>HNH42_RS14690</i> | hypothetical protein                            |
| <i>HNH42_RS14745</i> | DUF4163 domain-containing protein               |

|                      |                                                    |
|----------------------|----------------------------------------------------|
| <i>HNY42_RS14755</i> | hypothetical protein                               |
| <i>HNY42_RS14785</i> | hypothetical protein                               |
| <i>HNY42_RS14790</i> | hypothetical protein                               |
| <i>HNY42_RS14795</i> | DUF3267 domain-containing protein                  |
| <i>HNY42_RS14800</i> | oligosaccharide repeat unit polymerase             |
| <i>HNY42_RS14810</i> | hypothetical protein                               |
| <i>HNY42_RS14815</i> | glycosyltransferase family 4 protein               |
| <i>HNY42_RS14830</i> | NAD-dependent epimerase/dehydratase family protein |
| <i>HNY42_RS15485</i> | alpha/beta fold hydrolase                          |
| <i>HNY42_RS15490</i> | TetR family transcriptional regulator              |
| <i>HNY42_RS15510</i> | hypothetical protein                               |
| <i>HNY42_RS15515</i> | AAA family ATPase                                  |
| <i>HNY42_RS15540</i> | DUF2089 family protein                             |
| <i>HNY42_RS15545</i> | hypothetical protein                               |
