# Supplementary material for: Xerotolerance: A New Property in Exiguobacterium Genus
Source: MDPI journal article supplement (doi:10.3390/microorganisms9122455), 2021-11-28
Supplement: s1 [file s1]

**Table S5.** Other strains isolated by desiccation assay.

| Phylum         | Class               | Order            | Family                  | Genus                  | Strain        | Closest type strain                |
|----------------|---------------------|------------------|-------------------------|------------------------|---------------|------------------------------------|
| Proteobacteria | Alphaproteobacteria | Caulobacteriales | Caulobacteriaceae       | <i>Brevundimonas</i>   | HE24.1        | <i>Brevundimonas vesicularis</i>   |
| Firmicutes     | Bacilli             | Bacillales       | <i>Incertae sedis</i>   | <i>Exiguobacterium</i> | HE26.4        | <i>Exiguobacterium mexicanum</i>   |
|                |                     |                  | <i>Bacillaceae</i>      | <i>Bacillus</i>        | HE19.6        | <i>Bacillus pumilus</i>            |
|                |                     |                  |                         | <i>Bacillus</i>        | H19.15        | <i>Bacillus megaterium</i>         |
|                |                     |                  |                         | <i>Bacillus</i>        | HE20.1        | <i>Bacillus licheniformis</i>      |
|                |                     |                  |                         | <i>Bacillus</i>        | HE20.17       | <i>Bacillus licheniformis</i>      |
|                |                     |                  |                         | <i>Bacillus</i>        | HE24.8        | <i>Bacillus licheniformis</i>      |
|                |                     |                  |                         | <i>Bacillus</i>        | HE24.9        | <i>Bacillus licheniformis</i>      |
|                |                     |                  |                         | <i>Bacillus</i>        | HE23.1        | <i>Bacillus paralicheniformis</i>  |
|                |                     |                  |                         | <i>Bacillus</i>        | HE24.11       | <i>Bacillus megaterium</i>         |
|                |                     |                  |                         | <i>Bacillus</i>        | HE20.18       | <i>Bacillus safensis</i>           |
|                |                     |                  |                         | <i>Bacillus</i>        | HE20.19       | <i>Bacillus safensis</i>           |
|                |                     |                  |                         | <i>Bacillus</i>        | HE24.15       | <i>Bacillus circulans</i>          |
|                |                     |                  |                         | <i>Bacillus</i>        | HE21.16       | <i>Bacillus taxi</i>               |
|                |                     |                  | <i>Paenibacillaceae</i> | <i>Paenibacillus</i>   | HE24.5        | <i>Paenibacillus xylanilyticus</i> |
|                |                     |                  |                         | <i>Paenibacillus</i>   | HE24.6        | <i>Paenibacillus xylanilyticus</i> |
|                |                     |                  |                         | <i>Paenibacillus</i>   | HE24.7        | <i>Paenibacillus xylanilyticus</i> |
|                |                     |                  |                         | <i>Paenibacillus</i>   | HE24.13       | <i>Paenibacillus xylanilyticus</i> |
|                |                     |                  |                         | <i>Paenibacillus</i>   | E2A           | <i>Paenibacillus xylanilyticus</i> |
|                |                     |                  |                         | <i>Paenibacillus</i>   | E2B           | <i>Paenibacillus xylanilyticus</i> |
|                |                     |                  |                         | <i>Paenibacillus</i>   | E5            | <i>Paenibacillus lautus</i>        |
|                |                     |                  | <i>Planococcaceae</i>   | <i>Planococcus</i>     | HE26.1        | <i>Planococcus donghaensis</i>     |
|                |                     |                  |                         | <i>Planococcus</i>     | HE25.5Y       | <i>Planococcus donghaensis</i>     |
|                |                     |                  |                         | <i>Planococcus</i>     | HE21.14       | <i>Planococcus donghaensis</i>     |
|                |                     |                  |                         | <i>Planococcus</i>     | HE26.2 (secA) | <i>Planococcus glaciei</i>         |
|                |                     |                  |                         | <i>Planococcus</i>     | HE26.2 (secB) | <i>Planococcus glaciei</i>         |
|                |                     |                  |                         | <i>Planococcus</i>     | HE25.5H       | <i>Planococcus okeanokoikes</i>    |
| Actinobacteria | Actinomycetia       | Micrococcales    | <i>Micrococcaceae</i>   | <i>Arthrobacter</i>    | HE24.10       | <i>Arthrobacter luteolus</i>       |
| a              |                     |                  |                         | <i>Arthrobacter</i>    | HE26.12       | <i>Arthrobacter gandavensis</i>    |

|                |               |                     |                              |                           |          |                                           |
|----------------|---------------|---------------------|------------------------------|---------------------------|----------|-------------------------------------------|
| Actinobacteria | Actinomycetia | Mycobacteriales     | <i>Nocardiaceae</i>          | <i>Arthrobacter</i>       | HE26.26  | <i>Arthrobacter bussei</i>                |
|                |               |                     |                              | <i>Paenarthrobacter</i>   | HE19.5   | <i>Paenarthrobacter nitroguajacolicus</i> |
|                |               |                     |                              | <i>Pseudoarthrobacter</i> | HE19.16  | <i>Pseudoarthrobacter oxydans</i>         |
|                |               |                     |                              | <i>Micrococcus</i>        | HE26.32A | <i>Micrococcus luteus</i>                 |
|                |               |                     |                              | <i>Kocuria</i>            | HE26.7A  | <i>Kocuria gwangalliensis</i>             |
|                |               |                     |                              | <i>Kocuria</i>            | HE26.24A | <i>Kocuria gwangalliensis</i>             |
|                |               |                     |                              | <i>Kocuria</i>            | HE26.6   | <i>Kocuria gwangalliensis</i>             |
|                |               |                     |                              | <i>Kocuria</i>            | HE26.30B | <i>Kocuria rosea</i>                      |
|                |               |                     |                              | <i>Rhodococcus</i>        | HE24.12  | <i>Rhodococcus ruber</i>                  |
|                |               |                     |                              | <i>Rhodococcus</i>        | HE24.14  | <i>Rhodococcus coprophilus</i>            |
|                |               |                     | <i>Gordoniaceae</i>          | <i>Gordonia</i>           | HE24.3   | <i>Gordonia terrae</i>                    |
|                |               |                     |                              | <i>Gordonia</i>           | HE24.4J  | <i>Gordonia terrae</i>                    |
|                |               | Cellulomonadales    | <i>Promicromonosporaceae</i> | <i>Cellulosimicrobium</i> | HE19.14  | <i>Cellulosimicrobium Funkei</i>          |
|                |               |                     |                              | <i>Krasilnikovella</i>    | HE20.9   | <i>Krasilnikovella muralis</i>            |
|                |               | Streptosporangiales | <i>Nocardiopsaceae</i>       | <i>Nocardiopsis</i>       | HE24.2   | <i>Nocardiopsis umidischolae</i>          |
|                |               | Microbacteriales    | <i>Microbacteriaceae</i>     | <i>Microbacterium</i>     | HE21.26  | <i>Microbacterium esteraromaticum</i>     |
|                |               |                     |                              | <i>Microbacterium</i>     | HE21.24  | <i>Microbacterium paraoxydans</i>         |
|                |               |                     |                              | <i>Microbacterium</i>     | HE21.32  | <i>Microbacterium esteraromaticum</i>     |
|                |               |                     |                              | <i>Microbacterium</i>     | HE21.37  | <i>Microbacterium thalassium</i>          |
