# Supplementary figures and images for: Xerotolerance: A New Property in Exiguobacterium Genus
Source: MDPI journal article supplement (doi:10.3390/microorganisms9122455), 2021-11-28

Figure S1

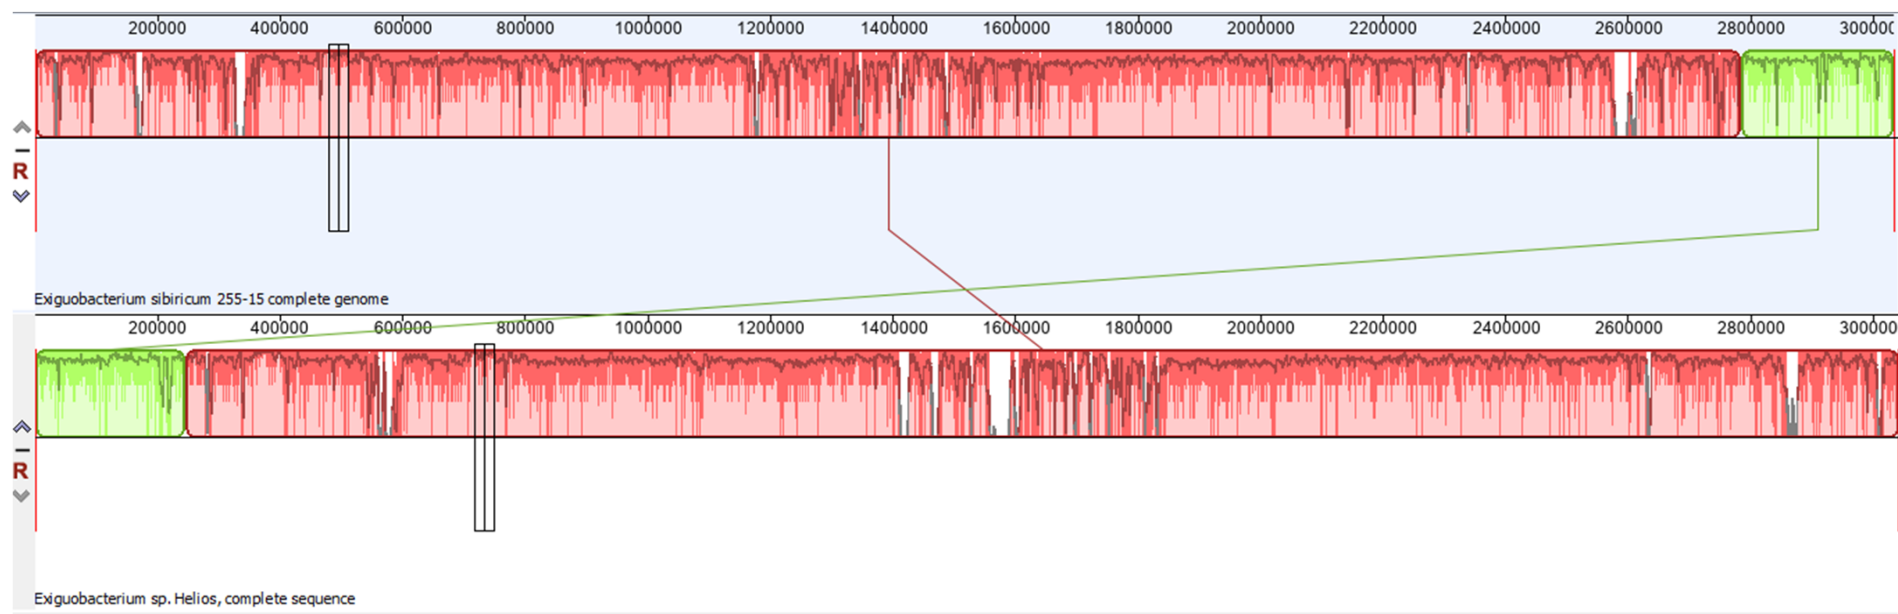

Figure S2

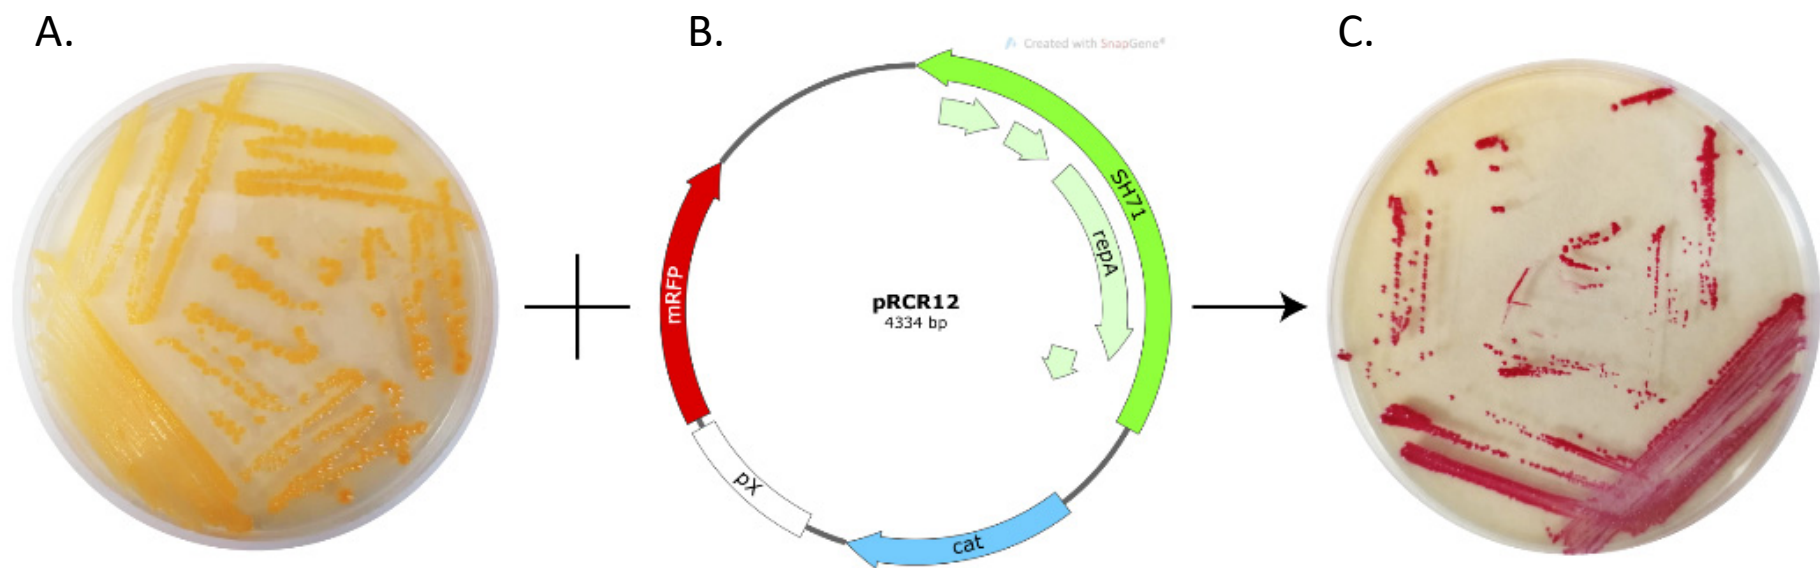

Figure S3

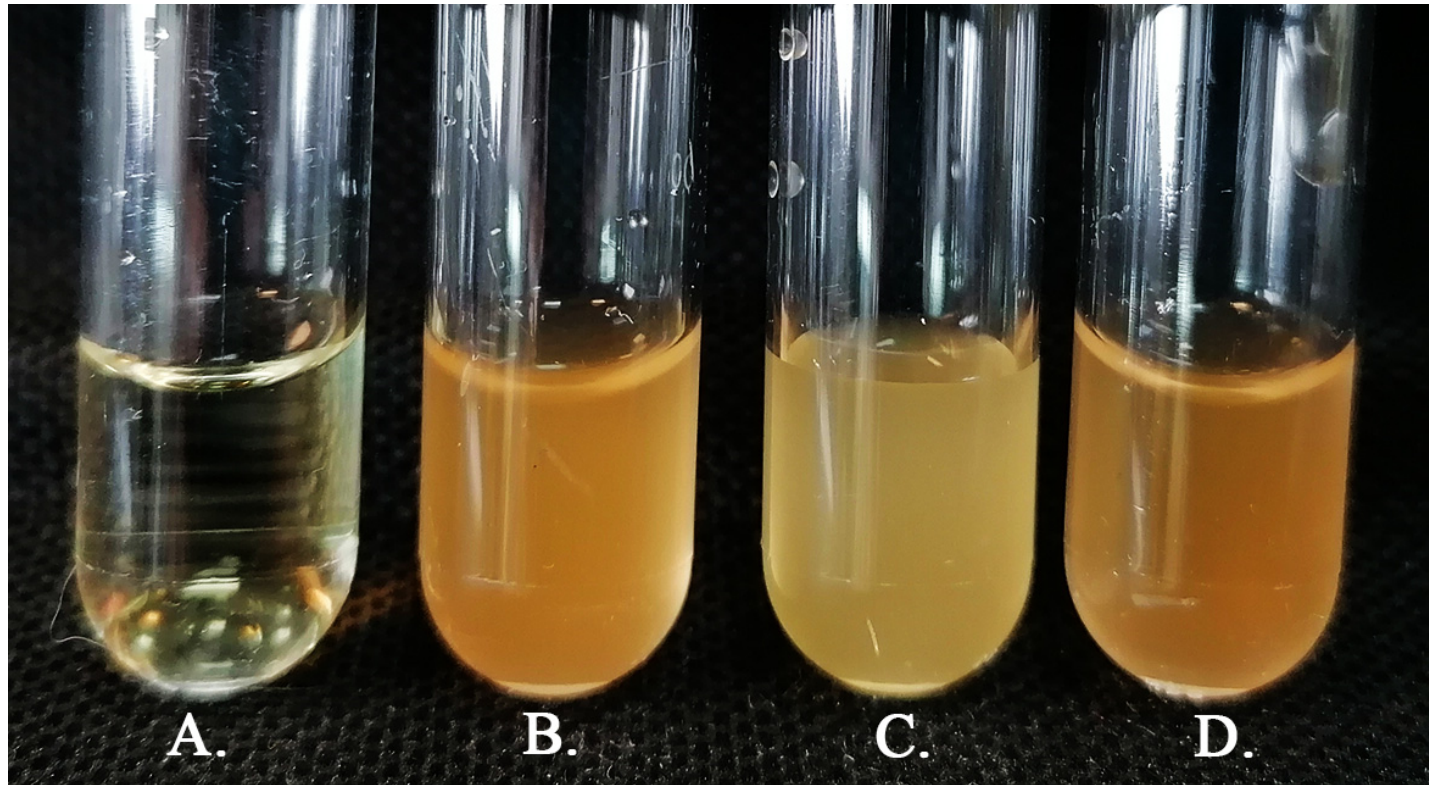

Supplement: s1 [file s1]
